# Supplementary material
Source: PubMed Central journal article supplement (PMC5885854)

## Supplementary Online Content

Saunders-Pullman R, Mirelman A, Alcalay RN, et al; *LRRK2* Ashkenazi Jewish Consortium. Progression in the *LRRK2*-associated Parkinson disease population. *JAMA Neurol*. Published online January 8, 2018. doi:10.1001/jamaneurol.2017.4019

**eTable.** Models Comparing Rate Change in UPDRS III, MoCA, and H&Y; *LRRK2* PD vs IPD (Among Participants With  $\geq 2$  Visits)

**eFigure 1.** Longitudinal Trajectories of Mean UPDRS III Scores in *LRRK2* PD Compared With IPD Restricted to Those With at Least Two Visits

**eFigure 2.** Longitudinal Trajectories of MoCA Scores in *LRRK2* PD Compared With IPD Restricted to Those With at Least Two Visits

**eFigure 3.** Longitudinal Trajectories of Mean UPDRS III Scores in *LRRK2* PD Compared With IPD Among Those With 20 Years of Disease or Less: Mean Trajectories From Models Restricted to Disease Duration  $\leq 20$  Years

**eFigure 4.** Longitudinal Trajectories of MoCA Scores in *LRRK2* PD Compared With IPD Among Those With 20 Years of Disease or Less

**eFigure 5.** Spaghetti Plots Demonstrating Change in UPDRS III Scores Relative to Time Since Baseline in *LRRK2* PD and IPD

This supplementary material has been provided by the authors to give readers additional information about their work.

**eTable.** Models Comparing Rate Change in UPDRS-III, MoCA, and H&Y; *LRRK2* PD vs IPD (Among Participants With  $\geq 2$  Visits)

| Predictors                                | UPDRS III    |                     |              | H&Y          |                    |              | MoCA        |                    |              |
|-------------------------------------------|--------------|---------------------|--------------|--------------|--------------------|--------------|-------------|--------------------|--------------|
|                                           | B            | 95% CI              | P            | B            | 95% CI             | P            | B           | 95% CI             | P            |
| <b>Rate difference, years<sup>b</sup></b> | <b>-0.38</b> | <b>-0.73, -0.04</b> | <b>0.031</b> | <b>-0.01</b> | <b>-0.04, 0.02</b> | <b>0.471</b> | <b>0.06</b> | <b>-0.06, 0.18</b> | <b>0.314</b> |
| Baseline age, years                       | 0.24         | 0.12, 0.37          | <0.001       | 0.02         | 0.01, 0.03         | <0.001       | -0.15       | -0.20, -0.10       | <0.001       |
| Sex, female reference                     | 3.68         | 1.38, 5.98          | 0.002        | 0.03         | -0.12, 0.18        | 0.725        | -0.51       | -1.26, 0.24        | 0.185        |
| <i>LRRK2</i> status, IPD reference        | 1.12         | -2.68, 4.92         | 0.562        | -0.09        | -0.34, 0.16        | 0.470        | 0.71        | -0.43, 1.85        | 0.22         |
| Site                                      |              |                     |              |              |                    |              |             |                    |              |
| MSBI                                      | -5.05        | -7.72, -2.37        | <0.001       | -0.03        | -0.20, 0.13        | 0.690        | 0.28        | -0.64, 0.02        | 0.547        |
| CUMC                                      | 0.32         | 2.37, 3.38          | 0.839        | 0.17         | -0.04, 0.39        | 0.103        | 1.01        | 1.21, 2.01         | 0.047        |
| Baseline duration, years                  | -0.32        | -0.72, 0.08         | 0.116        | -0.05        | -0.08, 0.02        | 0.003        | 0.06        | -0.13, 0.25        | <0.001       |
| LEDD                                      | 0.00         | 0.00, 0.00          | 0.651        | 0.00         | 0.00, 0.00         | 0.562        | 0.00        | 0.00, 0.00         | <0.001       |
| MoCA                                      | -0.45        | -0.66, -0.24        | <0.001       | -0.03        | -0.06, 0.01        | 0.004        | --          | --                 | --           |
| PD duration at visit, years <sup>a</sup>  | 1.03         | 0.64, 1.42          | <0.001       | 0.10         | 0.07, 0.12         | <0.001       | -0.15       | -0.37, 0.06        | 0.154        |

<sup>a</sup> Relative to IPD; <sup>b</sup> Between *LRRK2* carriers and IPD. TA: Tel Aviv; MSBI: Mount Sinai Beth Israel; CUMC: Columbia University Medical Center; LEDD: Levodopa equivalent daily dose; MoCA: Montreal Cognitive Assessment

**eFigure 1.** Longitudinal Trajectories of Mean UPDRS III Scores in *LRRK2* PD Compared With IPD Restricted to Those With at Least Two Visits  
Individuals had between 0 and 6 follow-up visits, and not all were followed for the duration noted on the x-axis. *The mean longitudinal trajectory is based on longitudinal data with up to 6.5 years of follow-up time adjusting for baseline disease duration and other covariates.*

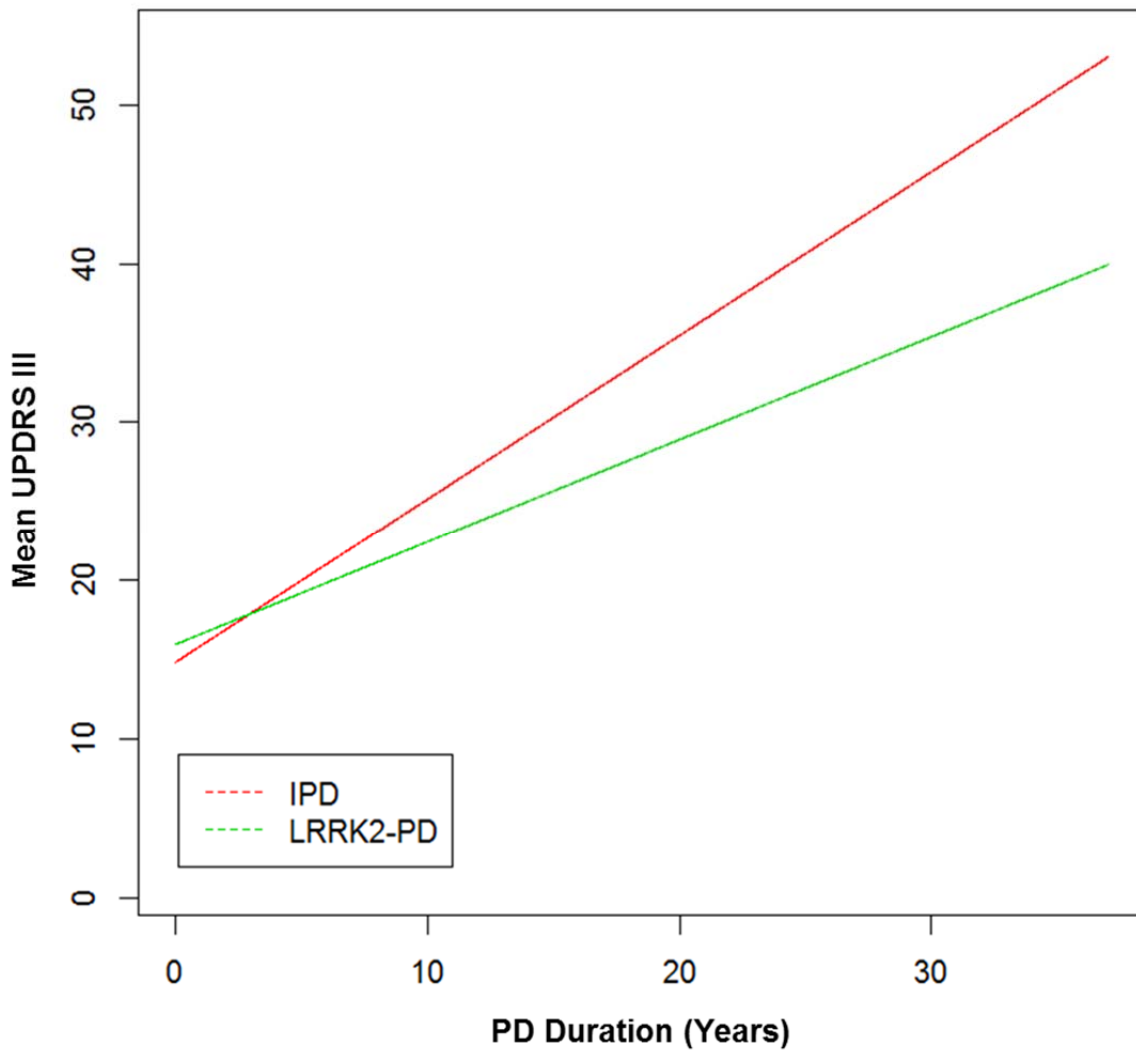

**eFigure 2.** Longitudinal Trajectories of MoCA Scores in *LRRK2* PD Compared With IPD Restricted to Those With at Least Two Visits  
Individuals had between 0 and 6 follow-up visits, and not all were followed for the duration noted on the x-axis. *The mean longitudinal trajectory is based on longitudinal data with up to 6.5 years of follow-up time adjusting for baseline disease duration and other covariates.*

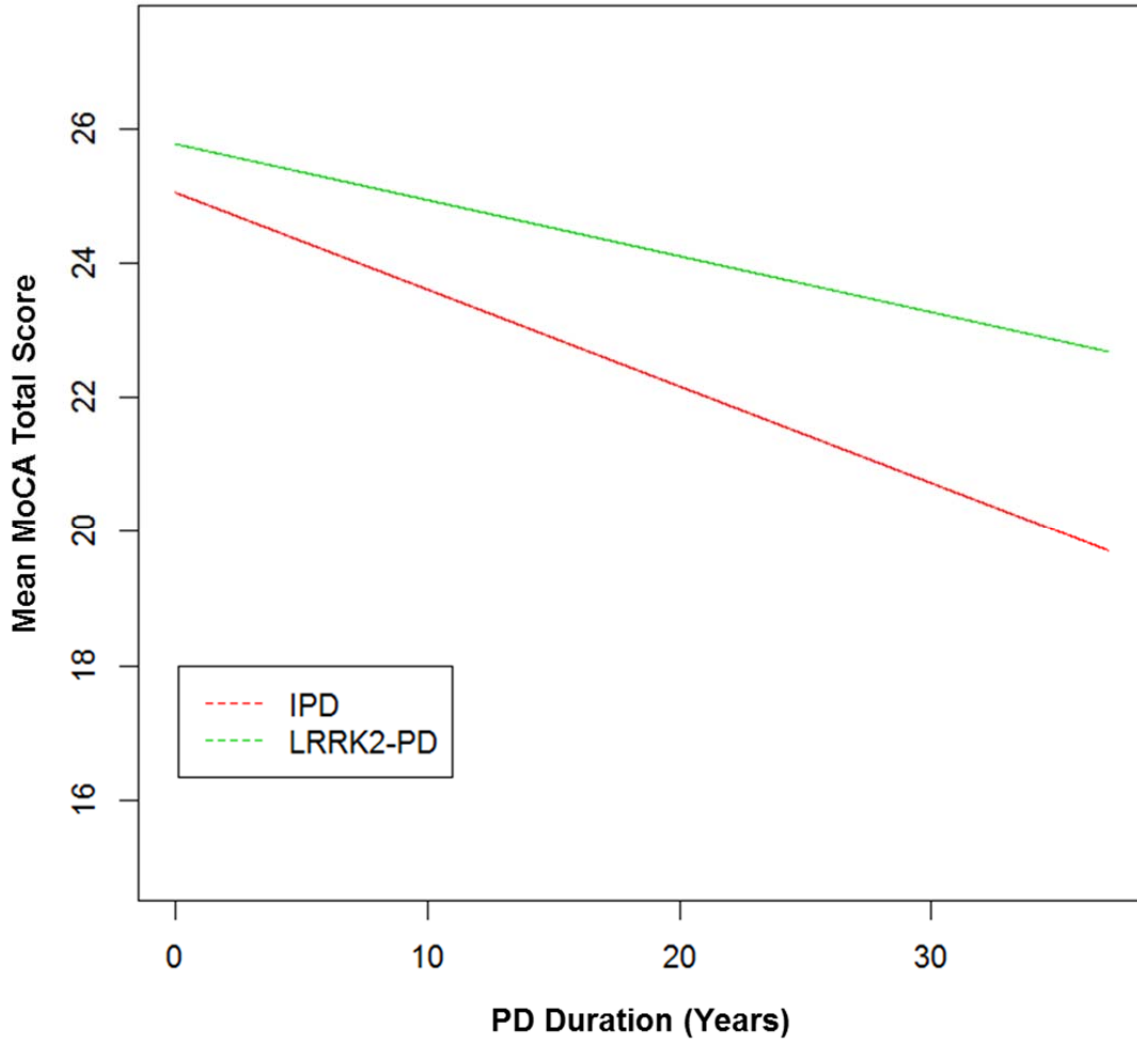

**eFigure 3.** Longitudinal Trajectories of Mean UPDRS III Scores in *LRRK2* PD Compared With IPD Among Those With 20 Years of Disease or Less: Mean Trajectories From Models Restricted to Disease Duration  $\leq 20$  Years

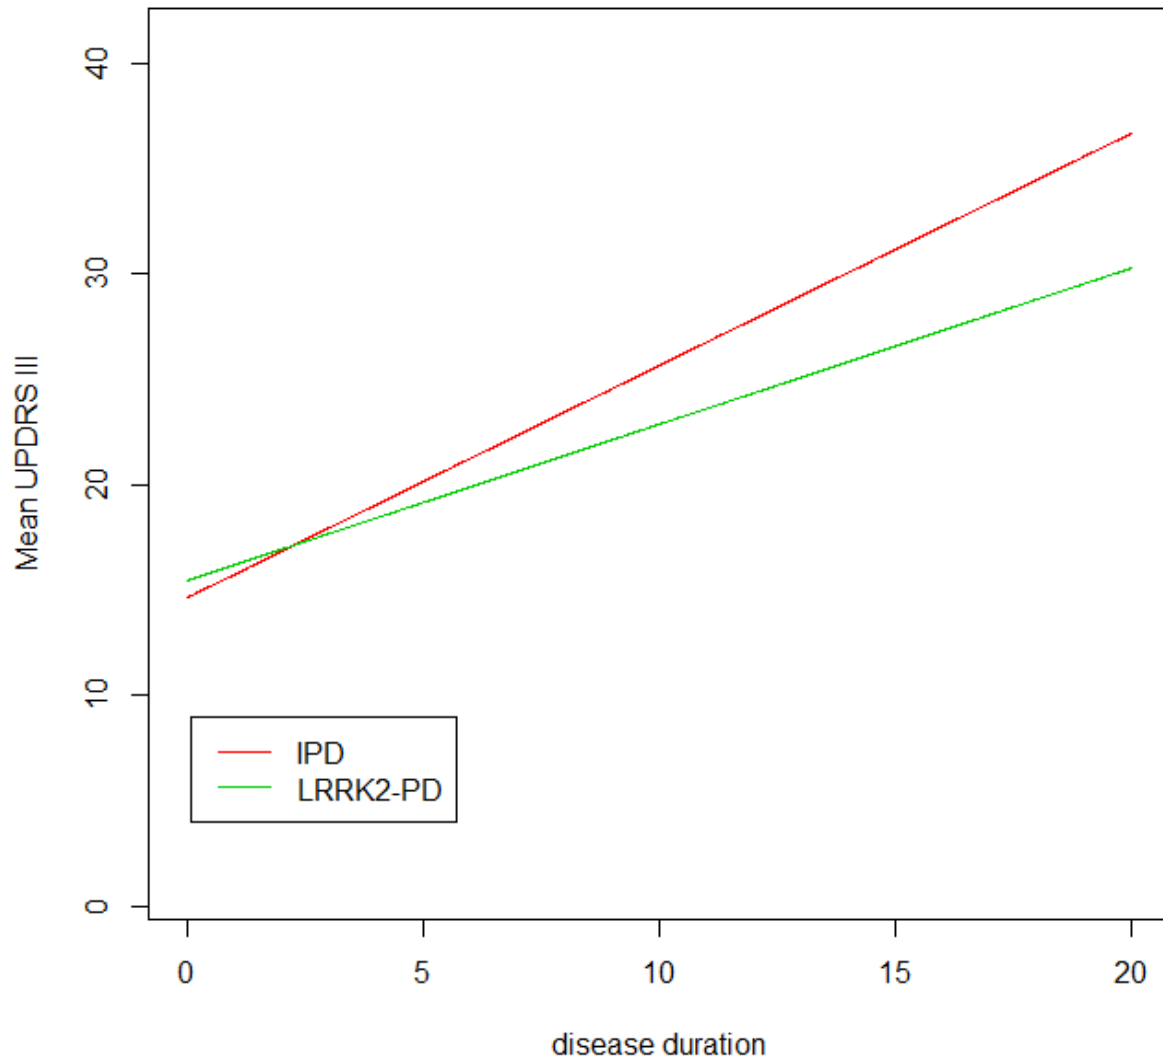

**eFigure 4.** Longitudinal Trajectories of MoCA Scores in *LRRK2* PD Compared With IPD Among Those With 20 Years of Disease or Less

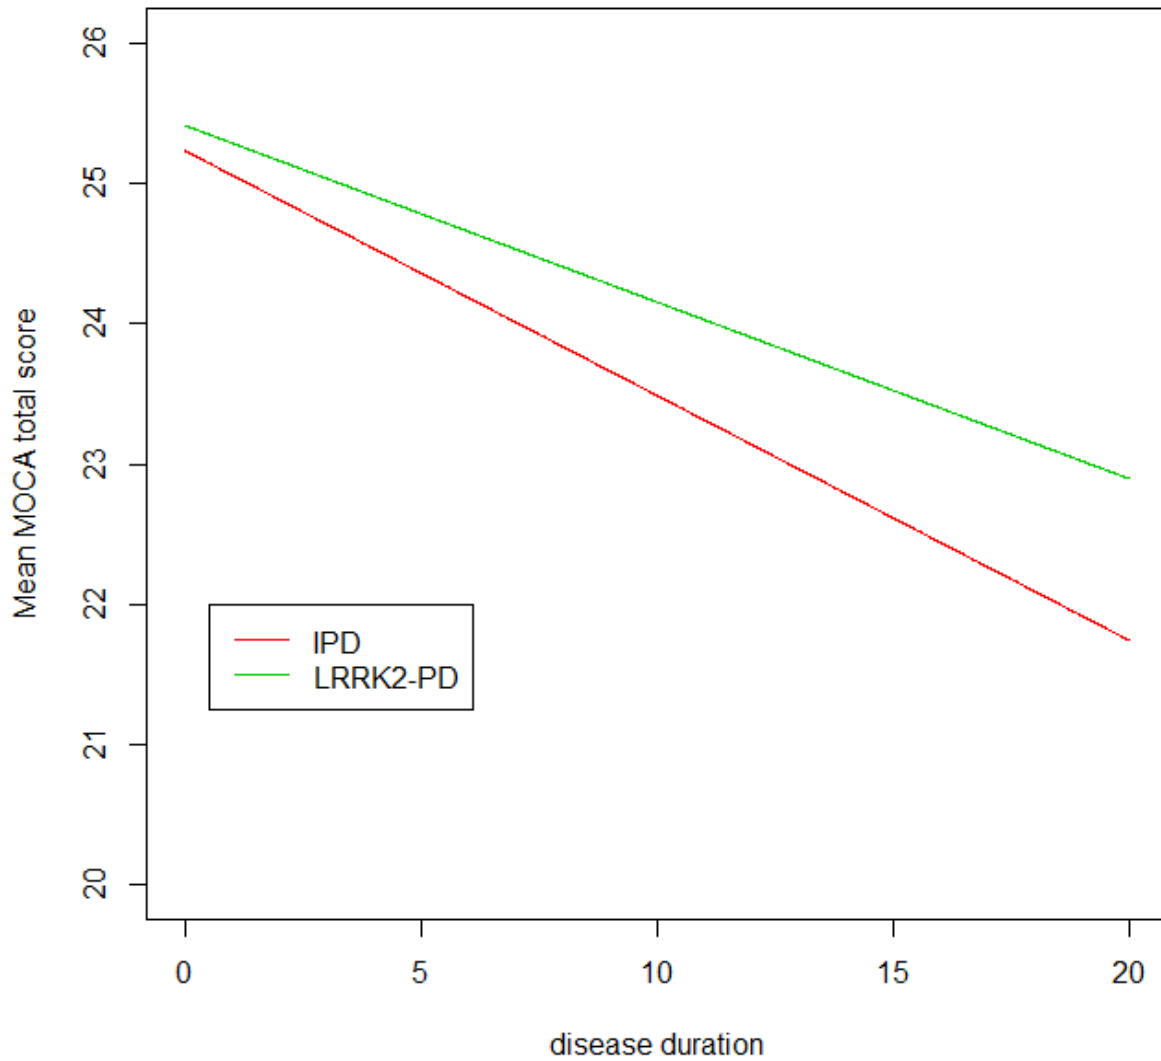

**eFigure 5.** Spaghetti Plots Demonstrating Change in UPDRS III Scores Relative to Time Since Baseline in *LRRK2* PD and IPD

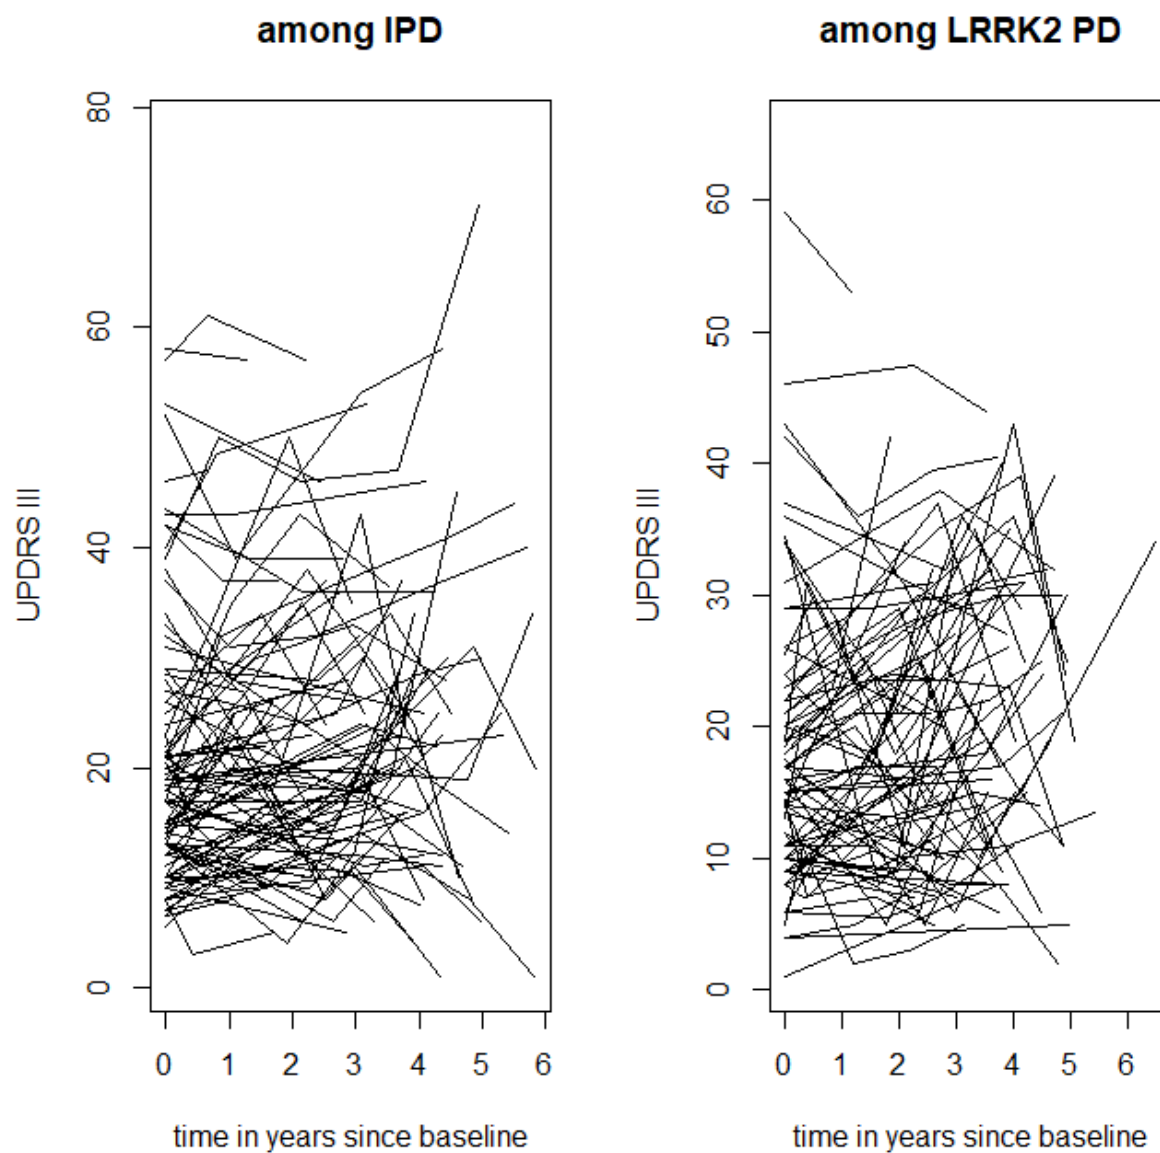

Supplement: jamaneurol-e174019-s001.pdf [file jamaneurol-e174019-s001.pdf]
